1 Antibiotic-induced shifts in fecal microbiota density and composition during hematopoietic  
2 stem cell transplantation

3  
4 Sejal Morjaria\*<sup>1,3,6</sup>, Jonas Schluter\*<sup>3,4</sup>, Bradford P. Taylor<sup>3,4</sup>, Eric R. Littmann<sup>2,3</sup>, Rebecca A. Carter<sup>2,3</sup>, Emily  
5 Fontana<sup>3</sup>, Jonathan U. Peled<sup>5,6</sup>, Marcel R.M. van den Brink<sup>2,5,6</sup>, Joao B. Xavier<sup>3,4</sup>, Ying Taur<sup>1,3,6</sup>

6

7 <sup>1</sup>Infectious Disease Service, Department of Medicine

8 <sup>2</sup> Immunology Program, Sloan Kettering Institute

9 <sup>3</sup> Center for Microbes, Inflammation and Cancer

10 <sup>4</sup>Computational Biology Program, Sloan Kettering Institute

11 <sup>5</sup> Adult Bone Marrow Transplant Service, Department of Medicine

12 <sup>1-5</sup> Memorial Sloan Kettering, New York, New York

13 <sup>6</sup> Weill Cornell Medical College, New York, NY

14 **\*S.M and J.S are co-first authors**

15 **Running Title:** Rapid shifts in fecal microbiota in HCT patients

16 **Corresponding author**

17

18 Ying Taur, MD, MPH, [taury@mskcc.org](mailto:taury@mskcc.org)

19 1275 York Avenue, Box 9, New York, NY 10065

20 T: 212-639-8873

21 **Keywords:** microbiome; antibiotics; systems biology; commensal anaerobes; hematopoietic cell

22 **transplantation**

23

24

25 **Abstract:**

26 **Background:** Dramatic microbiota changes and loss of commensal anaerobic bacteria are associated with  
27 adverse outcomes in hematopoietic cell transplantation (HCT) recipients. In this study, we demonstrate  
28 these dynamic changes at high-resolution through daily stool sampling and assess the impact of individual  
29 antibiotics on those changes.

30 **Methods:** We collected 272 longitudinal stool samples (with mostly daily frequency) from 18 patients  
31 undergoing HCT and determined their composition by multi-parallel 16S rRNA gene sequencing, as well  
32 as density of bacteria in stool by qPCR. We calculated microbiota volatility to quantify rapid shifts and  
33 developed a new dynamic systems inference method to assess the specific impact of antibiotics.

34 **Results:** The greatest shifts in microbiota composition occurred between stem cell infusion and  
35 reconstitution of healthy immune cells. Piperacillin-tazobactam caused the most severe declines among  
36 obligate anaerobes.

37 **Conclusions:** Our approach of daily sampling, bacterial density determination and dynamic systems  
38 modeling allowed us to infer the independent effects of specific antibiotics on the microbiota of HCT  
39 patients.

40

41

42

## 43 **Background**

44 Patients with a range of hematologic malignancies can be treated and potentially cured by hematopoietic  
45 cell transplantation (HCT). Prior to HCT, chemotherapy and/or total body irradiation are performed to  
46 deplete the cancerous cells. These treatments, combined with simultaneous antibiotic administration,  
47 compromise immune defenses, damage the mucosal epithelium, and deplete the native intestinal  
48 microbiota, facilitating the emergence of antibiotic-resistant organisms and increasing the risk of  
49 infections [1, 2]. Microbiome studies using fecal samples collected from allogeneic (allo-) HCT patients  
50 have previously revealed that patients experience severe reduction in the relative abundance of  
51 commensal bacteria over the course of treatment. This loss can result in blooms of potentially pathogenic  
52 microbial species [3], leading to downstream complications such as infections and graft-versus-host  
53 disease [4-6]. In particular, the loss of obligate anaerobic commensal bacteria such as Clostridia and  
54 Bacteroidetes negatively influence HCT outcomes shown in both animal models and humans [4, 7, 8].

55 Yet, the relative degree and manner in which various antibiotics and conditioning regimens  
56 contribute to microbiota disruption is still not well-described. In previous studies examining the  
57 microbiota changes in HCT patients, stool samples were either collected approximately once per week or  
58 at a limited number of time points [3-5, 9, 10]. Though these studies helped to form the foundation of  
59 our current understanding of microbiota disruption during all-HCT, we posit that a more frequent stool  
60 sample collection scheme, combined with dynamic modeling, would be beneficial for providing a higher  
61 resolution view of microbiota compositional changes over time, and where individual antibiotic effects  
62 can be discerned. Additionally, stool samples from many previous studies were characterized only in terms  
63 of relative abundance using 16S sequencing which does not allow quantitative calculations of species loss  
64 [11] and therefore, could potentially hamper attempts to quantitatively assess the effects of antibiotics  
65 on the microbiota.

66 In this study, we collected near-daily stool samples from 18 HCT recipients, for which we analyzed  
67 total species abundance by combining 16S sequencing in conjunction with quantitative PCR (qPCR) of the  
68 16S gene. We leveraged classical models of microbial growth with Bayesian regression techniques to  
69 quantify the impact of specific classes of antibiotics on anaerobic microbes representative of a ‘healthy’  
70 gut. Importantly, our model can be extrapolated to clinically guide sequential drug treatments that  
71 minimize detrimental effects on commensal bacteria. Our results reveal how important commensal  
72 anaerobic microbial species are lost during HCT.

73

## 74 **Methods**

### 75 **Study patients and fecal sample collection**

76 We followed 18 adult patients undergoing auto-HCT or allo-HCT at Memorial Sloan Kettering Cancer  
77 Center (MSKCC) from July 2015 to January 2016. There were 7 female and 11 male patients; their ages  
78 range from 40 to 75. Fecal samples were collected longitudinally from each patient during their transplant  
79 hospitalization using a prospective institutional fecal biospecimen collection protocol (described  
80 previously [3]). For the majority of patients, daily collection began at the start of pre-transplant  
81 conditioning (7-10 days before hematopoietic cell infusion) and continued until discharge, typically a  
82 month after HCT. The study protocol was approved by the MSKCC institutional review board; informed  
83 consent was obtained from all subjects prior to sample collection.

### 84 **Transplantation Practices**

85 At MSKCC, antimicrobial prophylaxis is given routinely to patients undergoing HCT. Subjects undergoing  
86 either auto- or allo-HCT are given oral (PO) ciprofloxacin two days prior to hematopoietic cell infusion, as  
87 prophylaxis against gram negative bacterial infections. Allo-HCT recipients are also given intravenous (IV)



88 vancomycin as prophylaxis against viridans-group streptococci [12]. Antibiotic prophylaxis against  
89 *Pneumocystis jiroveci* pneumonia was generally administered using either trimethoprim-  
90 sulfamethoxazole, aerosolized pentamidine, or atovaquone; the time at which prophylaxis was initiated  
91 (during conditioning or after engraftment, defined as an absolute neutrophil count of  $\geq 500$   
92 neutrophils/mm<sup>3</sup> for three consecutive days) varied. In the event of a new fever during times of  
93 neutropenia, patients were usually started on empiric antibiotics, such as piperacillin-tazobactam,  
94 cefepime, or meropenem.

### 95 **Sample Analysis of Microbial Composition**

96 Sample DNA was extracted and purified, and the V4-V5 region of the 16S rRNA gene was amplified with  
97 polymerase chain reaction using modified universal bacterial primers. Sequencing was performed using  
98 the Illumina Miseq platform [13] yielding paired-end reads with length up to 250bp. These reads were  
99 assembled, processed, filtered for quality, and grouped into operational taxonomic units of 97% similarity  
100 using the UPARSE pipeline [14]. Taxonomic assignment to species level was performed using nucleotide  
101 BLAST (Basic Local Alignment Search Tool) [15], with the National Center for Biotechnology Information  
102 RefSeq (refseq\_rna) as the reference database [16]. We determined the copy number of 16S rRNA genes  
103 per gram of stool for each sample by quantitative polymerase chain reaction (qPCR) on total DNA  
104 extracted from fecal samples. We assessed microbial diversity using the inverse Simpson index (for  
105 additional experimental details and microbiome data availability, see Supplementary Methods; all data  
106 used in this study are available as an excel file).

### 107 **Analytic approach**

108 We developed and employed a metric of 'compositional volatility' to quantify the rate of overall change  
109 in microbiota composition across adjacent samples in time. The volatility metric assesses overall  
110 community change by calculating the Manhattan distance between microbiota compositions, and ranges

111 between 0 and 1. It can be interpreted as the fraction of community turnover when comparing pairs of  
112 consecutive samples within a single patient. The volatility,  $V$ , for the community grouped at a taxonomic  
113 level,  $l$ , was determined by the expression:

$$114 \quad V(t + \Delta t/2) = \frac{1}{2\Delta t} \sum_{i \in l} |X_i(t + \Delta t) - X_i(t)|,$$

115 where  $\Delta t$  is the time in days between the consecutive samples and  $X_i(t)$  is the relative abundance of taxa  
116  $i$  at time  $t$ . We calculated volatility using relative abundances of microbes taxonomically grouped at the  
117 genus level. Theoretically, the most volatile points ( $V \approx 1$ ), would correspond to complete microbiota  
118 replacements between two time-adjacent samples, whereby previously abundant genera would be  
119 completely replaced by different genera.

120         The total abundances of anaerobes were calculated by multiplying the summed relative  
121 abundances of obligate anaerobic taxa obtained by 16S sequencing (see extended methods for protocols  
122 and details) with the total copy numbers of 16S genes obtained via qPCR. To estimate the effects of  
123 different antibiotics on specific microbial groups, we calculated the log-difference of absolute anaerobe  
124 cell counts per gram of stool (wet weight) between two samples ( $\Delta$ s) which were at most two days  
125 apart and both within the first hospitalization. We used Bayesian regression techniques to parameterize  
126 a model of the logistic growth of the obligate anaerobe community, used similarly before [17]. Antibiotic  
127 effects on bacterial reproduction or death were modeled as independently modifying the anaerobe  
128 population growth rate. We also define two phases during HCT where loss of anaerobes might occur:  
129 Phase I = pre-HCT (i.e. 1 if a sample pair was obtained before stem cell infusion, 0 otherwise); Phase II =  
130 post-HCT but pre-engraftment (i.e. 1 if between day 0 and engraftment, 0 otherwise). We accounted for  
131 repeated samples from the same patient by including a random intercept term ( $1|P$ ). Finally, we included  
132 a term that limits the otherwise exponential growth of anaerobes at high densities (the ‘capacity’ term of

133 the logistic growth equation, with associated parameter  $\beta_c$ ). Changes in the anaerobe abundance, (N),  
134 were modeled as:

$$135 \frac{\log(N_t) - \log(N_{t-\Delta t})}{\Delta t} = \mathcal{N}(r + \beta_{p1} \text{Phase I} + \beta_{p2} \text{Phase II} + \sum_{i \in I} \beta_{ai} A_i + \beta_o + (1|O) + (1|P) + \beta_c N_t, \sigma_m),$$

136 i.e. as a normally ( $\mathcal{N}$ ) distributed variable that is a function of intrinsic growth rate (r), the effects of Phase  
137 I ( $\beta_{p1}$ ), Phase II ( $\beta_{p2}$ ) and the growth-rate changing effects,  $\beta_{ai}$ , of empiric antibiotics ( $A_i$ ) and antibiotic  
138 prophylaxis ( $\beta_o$ , O), with the residual uncaptured variance of the model,  $\sigma_m$ ). As for phase I and II, we  
139 constructed binary antibiotic covariate indicators (1 if an antibiotic was administered during the interval  
140  $[t, t-\Delta t]$ , 0 otherwise).

141 We considered a group effect of prophylactic antibiotics ( $\beta_o$ ) from which each individual  
142 prophylactic antibiotic (fluoroquinolones, vancomycin (IV), trimethoprim-sulfamethoxazole, atovaquone)  
143 could deviate (1|O, partial pooling of the effects of antibiotic prophylaxis). The empirical antibiotics  
144 piperacillin-tazobactam, meropenem, metronidazole, cephalosporins (gen.1-3), vancomycin (PO),  
145 cefepime and linezolid were considered without pooling.

146 We used uninformative priors ( $\mathcal{N}(0, 100^2)$ ) for the growth rate, empirical antibiotics, and the  
147 HCT treatment phases, and regularizing priors ( $\mathcal{N}(0, 10^{-1})$ ) for the other parameters. This analysis  
148 produced posterior distributions for each parameter after “no U-turn” sampling 10,000 samples from 3  
149 traces [18], each corresponding to an estimate of the degree of impact on obligate anaerobic bacterial  
150 populations.

151 We used the posterior parameter distributions to assess our model. We simulated the predicted  
152 changes for each patient’s timeline, starting with the first observed anaerobe count from that patient. We  
153 sampled 100 posterior predictions of anaerobe changes between timepoints, and used the mean  
154 predicted change for the calculation of the anaerobe count in the next timestep.

155 To describe the effect of realistic antibiotic treatment regimens on the group of commensal  
156 anaerobes in HCT patients, we compiled a list of all antibiotic administration courses as they occurred in  
157 our patient group, i.e. the duration of administration, the period when it was administered (e.g. Phase I  
158 or Phase II), and other co-administered antibiotics. We then repeatedly chose a random antibiotic course  
159 from this list, with replacement, and assigned parameters, chosen jointly from the posterior parameter  
160 value distributions, to our model. Then, starting from an initial, normalized density set to 1, we used the  
161 model to calculate the predicted fold-change of anaerobe density at the end of each antibiotic course.  
162 Aggregating all these fold-changes allowed us to calculate the average residual fraction of anaerobes after  
163 a 'typical' course of specific antibiotics.

164

## 165 **Results**

### 166 **Description of study population and biospecimens**

167 Our cohort consisted of 18 patients who underwent auto- or allo-HCT at MSKCC between July 2015 to  
168 January 2016. Clinical characteristics and stool microbiome data for each patient are shown in Figure 1.  
169 Patients underwent different types of HCT for a variety of conditions; 14 patients underwent allo-HCT and  
170 4 underwent auto-HCT. The duration of transplant hospitalization ranged from 20 to 38 days, during which  
171 antibiotics were given for both prophylactic and treatment purposes. Throughout this period, we sought  
172 to collect fecal samples on a daily basis. A total of 272 samples were collected from the 18 patients (77%  
173 of the total 352 total inpatient hospital days). Of those samples, 236 (87%) yielded 16S amplicons that  
174 could be sequenced.

175 Consistent with previous findings [3, 5], all patients presented with high microbial diversity prior  
176 to HCT with species compositions that included diverse healthy anaerobic microbes; subsequent antibiotic

177 administration caused large-scale changes to the intestinal microbiota with decreases specifically noted  
178 in intestinal diversity and bacterial population as a whole (Figures 1 and 2). This observation was noted in  
179 both all-HCT and auto-HCT patients (Supplementary Figure 1), coinciding with completion of pre-  
180 transplant conditioning and administration of broad-spectrum antibiotics around day 0 (Supplementary  
181 Figure 2). We focused on the obligate anaerobic bacterial species that fall in the classes,  
182 Clostridia/Negativicutes and the phyla, Fusobacteria/Bacteroidetes (Figure 3A) and noted a sharp decline  
183 in these bacterial populations post-HCT (Figure 3B).

#### 184 **Subject-level Microbiome changes**

185 A single subject's timeline (patient 4) is presented in Figure 4, showing medications and treatments,  
186 clinical data, and intestinal microbiome composition (Figure 4A-C). All other patients are shown in  
187 Supplementary Figure 3. We observed successive alterations of the intestinal microbiota in each patient  
188 over the course of transplantation. These dynamic changes seemed to correspond with specific changes  
189 in antibiotic administration. The loss of obligate anaerobic bacteria appeared to coincide more with the  
190 administration of certain types of antibiotics. Anaerobic microbes seemed relatively spared in some  
191 patients during periods where they remained only on prophylactic antibiotics (i.e. IV vancomycin,  
192 ciprofloxacin). In these 18 patients, we observed two patients with bloodstream infections, which were  
193 preceded by intestinal expansion of the corresponding pathogen (*Escherichia. coli* in Patient 5, and  
194 vancomycin-resistant *Enterococcus faecium* (VRE) in Patient 17; Supplementary Figure 3).

195 To quantify day-to-day community shifts, we assessed the compositional volatility of the  
196 microbiota between daily intervals, reflecting the overall degree of compositional change over time  
197 (Figure 4D, Supplementary Figure 3). In our patients, microbiota volatility was on average highest  
198 immediately following transplant (Supplementary Figure 4).

199

## 200 **Antibiotic-induced loss of obligate anaerobic bacteria**

201 Our model of microbial growth of obligate anaerobic bacteria identified piperacillin-tazobactam and  
202 meropenem as independently having the most detrimental impact on obligate anaerobes. Additionally,  
203 our model indicated a potential negative effect of metronidazole, cephalosporins (generation 1-3), and  
204 oral vancomycin, whereas fluoroquinolones, vancomycin (IV), and trimethoprim-sulfamethoxazole had no  
205 impact (Figure 5A). Furthermore, our model identified loss of obligate anaerobic bacteria when a patient  
206 experienced post-HCT neutropenia before neutrophil engraftment (Phase II), in addition to the effects of  
207 antibiotics. The model did not infer an exponential-growth limiting effect of the obligate anaerobe  
208 community onto itself (capacity). We were able to qualitatively capture the anaerobe dynamics of each  
209 patient's time course, including major inflection points, by simulating each patient forwards in time  
210 starting with their first observed density of commensal anaerobes (Supplementary Figure 5).

211 We then predicted the effect of entire courses of piperacillin-tazobactam and meropenem as they  
212 occurred among our patients, i.e. including the effects of the period they were administered in (Phase I,  
213 Phase II or thereafter) as well as co-administered other antibiotics (Figure 5B, see methods). Due to  
214 differences in the duration of administrations and variation in co-administered antibiotics during these  
215 courses, the predicted loss of anaerobes was also variable (e.g. a longer course would yield a larger total  
216 loss of anaerobes). Yet, importantly, our model estimated that among our patients, courses with  
217 meropenem, and piperacillin-tazobactam each lead to >99% loss of obligate anaerobic bacteria  
218 (Figure 5B).

219

## 220 **Discussion**

221 Under normal circumstances, the human intestinal microbiota is relatively stable over time, and largely  
222 consists of obligate anaerobic bacteria [19]. In contrast to this norm, our study shows dramatic day-to-

223 day shifts in bacterial density and microbiota composition for HCT patients undergoing antibiotic  
224 treatment. Given the frequent administration of broad-spectrum antibiotics and the impact of HCT on  
225 immune defenses, mucosal epithelial integrity and dietary intake, these extreme shifts in microbiota-  
226 composition are perhaps unsurprising. In this study, our goal was to contextualize these compositional  
227 microbiota changes in terms of response to specific antibiotics [20]. We believe that a precise  
228 understanding and appreciation of antimicrobial influences on the microbiota can help inform antibiotic  
229 decision-making within the clinical setting, in order to protect against microbiota disruption and pathogen  
230 invasion. Our study is a first step towards the goal of minimizing unintended collateral damage to the  
231 commensal microbiota through the improved use of antibiotics.

232 Here, we show that patients can differ in terms of the rapidity, magnitude and quality of  
233 microbiota alterations, which likely reflect differences in baseline microbiota composition, exposure to  
234 antibiotics, and degrees of immune compromise and epithelial damage. The frequent stool sampling  
235 coupled with 16S qPCR and detailed clinical data, allowed us to now quantify the impact of specific  
236 antibiotics on microbiota composition. In our modeling approach, we incorporated absolute measures of  
237 16S abundance and therefore were able to study microbiome dynamics as rate changes. This would be  
238 impossible with 16S relative abundance, and the resulting covariance bias could make it impossible to  
239 disentangle loss of anaerobes from increases in other taxa [21]. In some instances, our goal of daily stool  
240 collection was not well-met, leading to interval censoring.

241 We decided to analyze obligate anaerobic bacteria together in a single group (Clostridia,  
242 Bacteroidetes, Negativicutes and Fusobacteria) given their ties to healthy immunity and colonization  
243 resistance [4, 8, 10]. The premise that obligate anaerobic bacteria represented the vast majority of the  
244 normal colonic flora and conferred colonization resistance is rooted in pre-microbiome observations using  
245 culture-based methods, some as far back as 50 years ago [22]. Several studies have showcased their

246 critical role in maintaining intestinal immune homeostasis [23-25] and association with good clinical  
247 outcomes [26, 27]. Admittedly, it is not known to what degree being ‘anaerobic’ approximates a truly  
248 beneficial microbiota. That said, by attempting to combine and study obligate anaerobic bacteria as we  
249 did, we were able to better align our results with existing clinical knowledge [28]; our model identified  
250 piperacillin-tazobactam and meropenem as major causes of obligate anaerobe loss, while metronidazole  
251 showed a propensity for obligate anaerobe killing, but to a lesser effect. A more robust killing effect on  
252 anaerobes by metronidazole may not have been seen because too few patients got this antibiotic (2), and  
253 it was often given during phase I and phase II, which may have offset its effect.

254 Our approach also demonstrated a degree of anaerobic impact from cephalosporins (generation  
255 1-3). Although not traditionally thought to treat anaerobic infections, ceftriaxone and cefazolin have  
256 shown to have some activity against *Clostridium* spp. [29]. The killing potential of cephalosporins could  
257 also be explained by confounding factors such as its concurrent administration with specific conditioning  
258 treatments during Phase I that were not included explicitly in our model (patients 6 and 13;  
259 Supplementary Figure 3).

260 Indeed, we observed significant anaerobic loss during the time window of Phase II, i.e. post-HCT  
261 but prior to neutrophil engraftment day. Independent of antibiotic effects, these results may reflect direct  
262 conditioning-related effects that directly impact intestinal homeostasis, which we suspect occurs to at  
263 least to a certain degree. These effects could consist of damage from chemotherapy and/or radiation,  
264 either to the intestinal mucosa (thereby impacting niche factors and microbiome homeostasis), or to  
265 anaerobic bacteria directly within the lumen.

266 HCT exposes the intestinal microbiota to a wide variety of environmental changes including a new  
267 residence and diet and creates a complex ecosystem that is difficult to model. However, despite this being  
268 a pilot study of HCT patients, we feel our model performed well, and provided promising results largely



269 consistent with our clinical impressions. Discerning the individual effects of different antibiotics and  
270 chemotherapy on the microbiota was a challenge, as simultaneous drug administrations are common, but  
271 we are confident with our model estimations for individual antibiotic effects. Still, our complex patient  
272 population and small sample size meant some of our results consisted of wide credibility intervals, which  
273 estimate population parameters with lower precision. Our model therefore predicted the time courses of  
274 patients qualitatively, capturing inflection points of major anaerobe loss rather than predicting time  
275 courses with high quantitative accuracy. To bypass these potential limitations, we will continue to  
276 accumulate high frequency, quantitative microbiome data in conjunction with clinical metadata to better  
277 predict the individual effects of each drug.

278           Understanding collateral damages to the microbiota is not only relevant to prevent microbiome  
279 dysbiosis-related disease, but also to prevent the rise of antibiotic resistant pathogens [20, 30]. A better  
280 understanding of the dynamics that render a complex microbiota permissive to pathogen expansion has  
281 the potential to shape and improve basic principles of antibiotic stewardship.

282

283 **Footnotes**

284 **Conflict of interest:**

285 M.v.d.B. has received research support from Seres Therapeutics; has consulted, received honorarium  
286 from or participated in advisory boards for Seres Therapeutics, Flagship Ventures, Novartis, Evelo, Jazz  
287 Pharmaceuticals, Therakos, Amgen, Merck & Co, Inc., Acute Leukemia Forum (ALF) and DKMS Medical  
288 Council (Board); has IP Licensing with Seres Therapeutics and Juno Therapeutics.

289

290 **Funding Statement:** This work was supported by the National Institutes of Health (grants U01AI124275-  
291 03 to J.B.X; R01-CA228358 to M.v.d.B; P30 CA008748 MSK Cancer Center Support Grant/Core Grant, and  
292 Project 4 of P01-CA023766 to R. J. O'Reilly/M.v.d.B.). This work was further supported by the Parker  
293 Institute for Cancer Immunotherapy at Memorial Sloan Kettering Cancer Center. the Sawiris Foundation;  
294 the Society of Memorial Sloan Kettering Cancer Center; MSKCC Cancer Systems Immunology Pilot Grant,  
295 and Empire Clinical Research Investigator Program.

296

297 **Meeting(s) where the information has previously been presented:** The information contained in this  
298 paper has been presented at previous National meetings.

299 **Corresponding author contact information:**

300 Ying Taur, MD, MPH

301 Correspondence: Ying Taur, MD, MPH, Memorial Sloan-Kettering Cancer Center, 1275 York Avenue, Box  
302 9, New York, NY 10065

303 Email: [taury@mskcc.org](mailto:taury@mskcc.org)

304

305 **Figure Captions:**

306 **Figure 1: Clinical characteristics of all 18 HCT patients.** Right panel depicts timing of stool collection during  
307 the course of transplantation (rectangles), relative to hematopoietic cell infusion (day 0), for each patient.  
308 Stacked colors represent each sample's microbiota composition (based on 16S sequencing). Boxes are  
309 drawn around the anaerobes. Pink shading represents times of inpatient hospitalization. Abbreviations:  
310 Auto, autologous; Allo, allogeneic; RIC, reduced intensity conditioning; MA, myeloablative; IV,  
311 intravenous; PO, oral; cipro, ciprofloxacin; metro, metronidazole; pip-tazo, piperacillin-tazobactam; mero,  
312 meropenem; vanco, vancomycin; TMP-SMX, trimethoprim-sulfamethoxazole, *C diff*; *Clostridium difficile*;  
313 BSI; blood stream infection; VRE; vancomycin resistant enterococci

314

315 **Figure 2: Microbiota changes in diversity and density during HCT.** During conditioning, before  
316 hematopoietic cell transfusion (day 0, red vertical dashed line), the community diversity (A) of the  
317 microbiota in both allo- and auto-HCT patients declined rapidly. Similarly, the bacterial density declined,  
318 plotted as the total number of bacterial cells per gram of stool (B), and only mild recovery of cell counts  
319 was observed towards the latest days of hospitalization (and there, mostly in allo- patients,  
320 Supplementary Figure 1).

321

322 **Figure 3: Timeline over the course of transplantation, for a single HCT patient (Patient 4).** Antibiotic  
323 administration and chemotherapy regimen during conditioning (Phase I), post-HCT neutropenia before  
324 engraftment (Phase II), and post-engraftment (A). White blood cell counts across treatment with fever  
325 (thermometers) indicated (B). Relative abundances by 16S sequencing grouped at indicated taxon level  
326 during this patient's HCT admission was collected almost daily (C). On day +3 the patient had a fever and

327 received broad spectrum antibiotics as a result. Volatility quantifies the rate of change in microbiota  
328 composition across adjacent time points (D).

329

330 **Figure 4: Obligate anaerobe grouping:** Bacterial phylogenetic tree indicating in brown the groups we  
331 classified as commensal anaerobes (A). Average commensal anaerobe density across all patients (B, line:  
332 mean values per day using locally weighted scatterplot smoothing [31]).

333

334 **Figure 5: Specific antibiotic effects in HCT patients.** Posterior parameter estimates from Bayesian linear  
335 regression of our model of antibiotic effects on obligate anaerobes. 95% Credibility intervals from three  
336 independent Markov Chain Monte Carlo traces with No-U-turn sampling. Distributions of predicted loss  
337 of anaerobes due to piperacillin-tazobactam and meropenem courses typical for our patient cohort (see  
338 methods for details, B).

---

339

340

341

342

343

344

345

346

347

348

349

350

351

352

353

354

355

356

357 **References**

- 358 1. Yu, J., *Intestinal stem cell injury and protection during cancer therapy*. *Transl Cancer Res*, 2013.  
359 **2**(5): p. 384-396.
- 360 2. Greenberger, J.S., *Radioprotection*. *In Vivo*, 2009. **23**(2): p. 323-36.
- 361 3. Taur, Y., et al., *Intestinal domination and the risk of bacteremia in patients undergoing allogeneic*  
362 *hematopoietic stem cell transplantation*. *Clin Infect Dis*, 2012. **55**(7): p. 905-14.
- 363 4. Jenq, R.R., et al., *Intestinal Blautia Is Associated with Reduced Death from Graft-versus-Host*  
364 *Disease*. *Biol Blood Marrow Transplant*, 2015. **21**(8): p. 1373-83.
- 365 5. Taur, Y., et al., *The effects of intestinal tract bacterial diversity on mortality following allogeneic*  
366 *hematopoietic stem cell transplantation*. *Blood*, 2014. **124**(7): p. 1174-82.
- 367 6. Vanhoecke, B., et al., *Microbiota and their role in the pathogenesis of oral mucositis*. *Oral Dis*,  
368 2015. **21**(1): p. 17-30.
- 369 7. Taur, Y. and E.G. Pamer, *The intestinal microbiota and susceptibility to infection in*  
370 *immunocompromised patients*. *Curr Opin Infect Dis*, 2013. **26**(4): p. 332-7.
- 371 8. Lee, Y.J., et al., *Protective Factors in the Intestinal Microbiome Against Clostridium difficile*  
372 *Infection in Recipients of Allogeneic Hematopoietic Stem Cell Transplantation*. *J Infect Dis*, 2017.  
373 **215**(7): p. 1117-1123.
- 374 9. Weber, D., et al., *Detrimental effect of broad-spectrum antibiotics on intestinal microbiome*  
375 *diversity in patients after allogeneic stem cell transplantation: Lack of commensal sparing*  
376 *antibiotics*. *Clin Infect Dis*, 2018.
- 377 10. Weber, D., et al., *Microbiota Disruption Induced by Early Use of Broad-Spectrum Antibiotics Is an*  
378 *Independent Risk Factor of Outcome after Allogeneic Stem Cell Transplantation*. *Biol Blood*  
379 *Marrow Transplant*, 2017. **23**(5): p. 845-852.
- 380 11. Gonze, D., et al., *Microbial communities as dynamical systems*. *Curr Opin Microbiol*, 2018. **44**: p.  
381 41-49.
- 382 12. Tunkel, A.R. and K.A. Sepkowitz, *Infections caused by viridans streptococci in patients with*  
383 *neutropenia*. *Clin Infect Dis*, 2002. **34**(11): p. 1524-9.
- 384 13. Caporaso, J.G., et al., *Ultra-high-throughput microbial community analysis on the Illumina HiSeq*  
385 *and MiSeq platforms*. *ISME J*, 2012. **6**(8): p. 1621-4.
- 386 14. Edgar, R.C., *UPARSE: highly accurate OTU sequences from microbial amplicon reads*. *Nat Methods*,  
387 2013. **10**(10): p. 996-8.
- 388 15. Altschul, S.F., et al., *Basic local alignment search tool*. *J Mol Biol*, 1990. **215**(3): p. 403-10.
- 389 16. Tatusova, T., et al., *RefSeq microbial genomes database: new representation and annotation*  
390 *strategy*. *Nucleic Acids Res*, 2015. **43**(7): p. 3872.
- 391 17. Stein, R.R., et al., *Ecological modeling from time-series inference: insight into dynamics and*  
392 *stability of intestinal microbiota*. *PLoS Comput Biol*, 2013. **9**(12): p. e1003388.
- 393 18. Matthew D. Homan, A.G., *The No-U-turn sampler: adaptively setting path lengths in Hamiltonian*  
394 *Monte Carlo*. *The Journal of Machine Learning Research*, 2014. **15**(1): p. 1593-1623.
- 395 19. Lozupone, C.A., et al., *Diversity, stability and resilience of the human gut microbiota*. *Nature*, 2012.  
396 **489**(7415): p. 220-30.
- 397 20. Donskey, C.J., et al., *Effect of antibiotic therapy on the density of vancomycin-resistant enterococci*  
398 *in the stool of colonized patients*. *N Engl J Med*, 2000. **343**(26): p. 1925-32.

- 399 21. Aitchison, J., *A new approach to null correlations of proportions*. Journal of the International  
400 Association for Mathematical Geology, 1981. **13**(2): p. 175-189.
- 401 22. van der Waaij, D., J.M. Berghuis-de Vries, and L.-v. Lekkerkerk, *Colonization resistance of the*  
402 *digestive tract in conventional and antibiotic-treated mice*. J Hyg (Lond), 1971. **69**(3): p. 405-11.
- 403 23. Maier, E., R.C. Anderson, and N.C. Roy, *Understanding how commensal obligate anaerobic*  
404 *bacteria regulate immune functions in the large intestine*. Nutrients, 2014. **7**(1): p. 45-73.
- 405 24. Kelly, D., et al., *Commensal anaerobic gut bacteria attenuate inflammation by regulating nuclear-*  
406 *cytoplasmic shuttling of PPAR-gamma and RelA*. Nat Immunol, 2004. **5**(1): p. 104-12.
- 407 25. Hooper, L.V., et al., *Angiogenins: a new class of microbicidal proteins involved in innate immunity*.  
408 Nat Immunol, 2003. **4**(3): p. 269-73.
- 409 26. Atarashi, K., et al., *Treg induction by a rationally selected mixture of Clostridia strains from the*  
410 *human microbiota*. Nature, 2013. **500**(7461): p. 232-6.
- 411 27. Reeves, A.E., et al., *Suppression of Clostridium difficile in the gastrointestinal tracts of germfree*  
412 *mice inoculated with a murine isolate from the family Lachnospiraceae*. Infect Immun, 2012.  
413 **80**(11): p. 3786-94.
- 414 28. Leekha, S., C.L. Terrell, and R.S. Edson, *General principles of antimicrobial therapy*. Mayo Clin Proc,  
415 2011. **86**(2): p. 156-67.
- 416 29. Chow, A.W. and D. Bednorz, *Comparative in vitro activity of newer cephalosporins against*  
417 *anaerobic bacteria*. Antimicrob Agents Chemother, 1978. **14**(5): p. 668-71.
- 418 30. Becattini, S., Y. Taur, and E.G. Pamer, *Antibiotic-Induced Changes in the Intestinal Microbiota and*  
419 *Disease*. Trends Mol Med, 2016. **22**(6): p. 458-478.
- 420

421

422

423

424 Figure 1

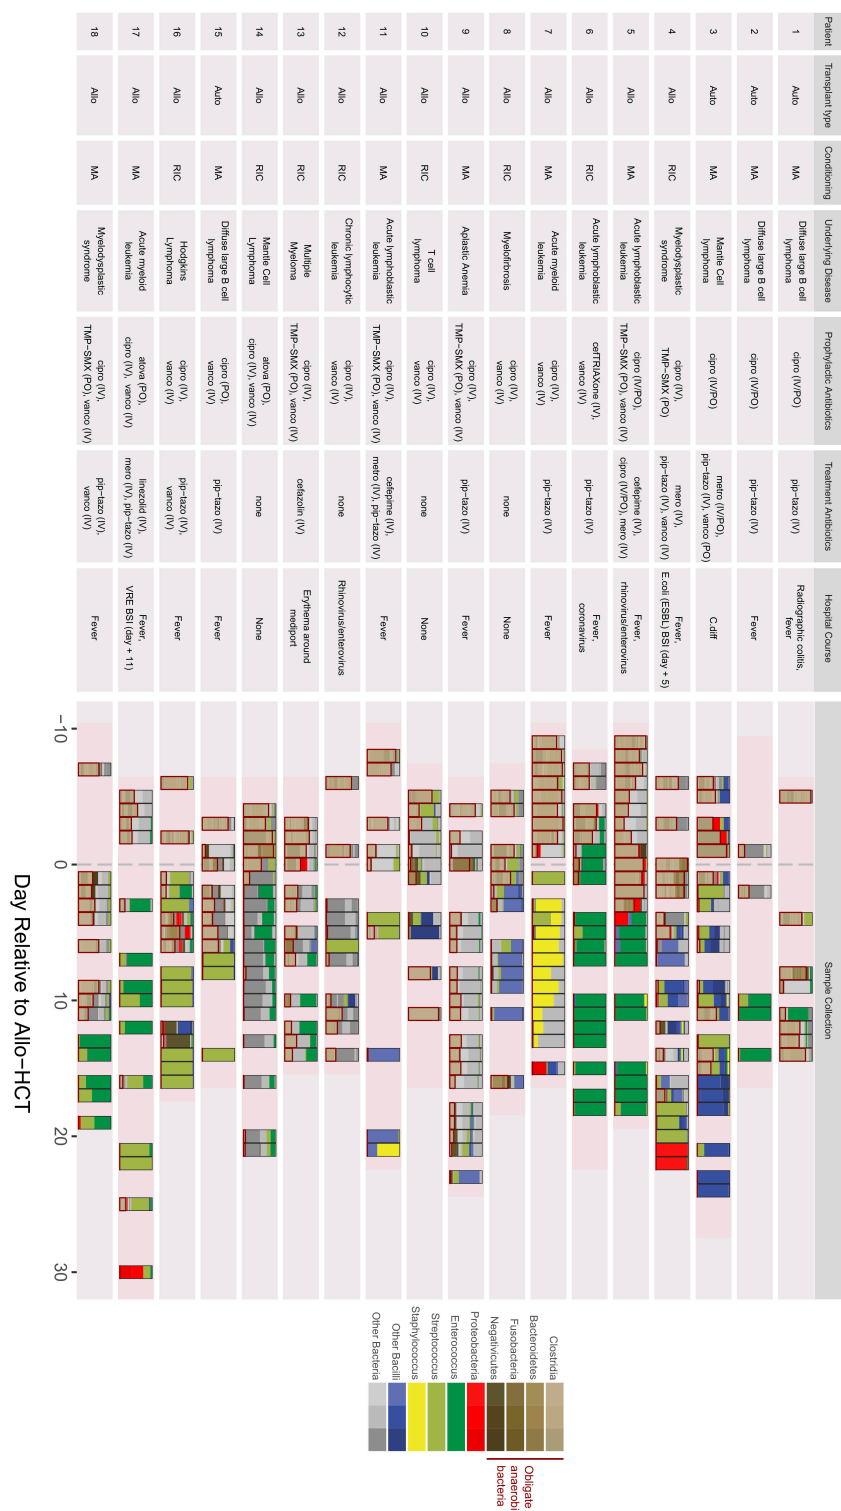

426 Figure 2:

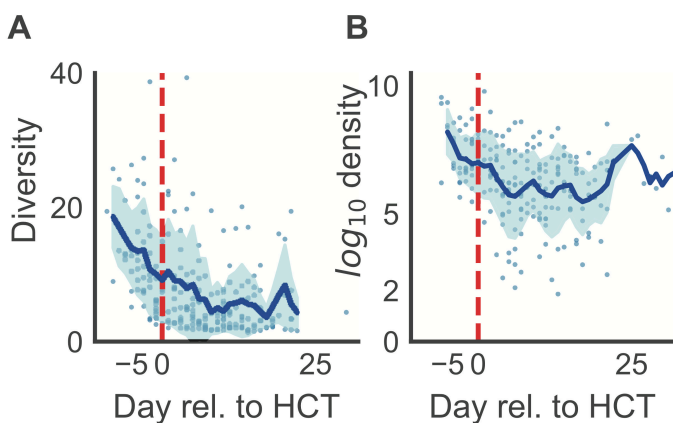

427

428

429 Figure 3:

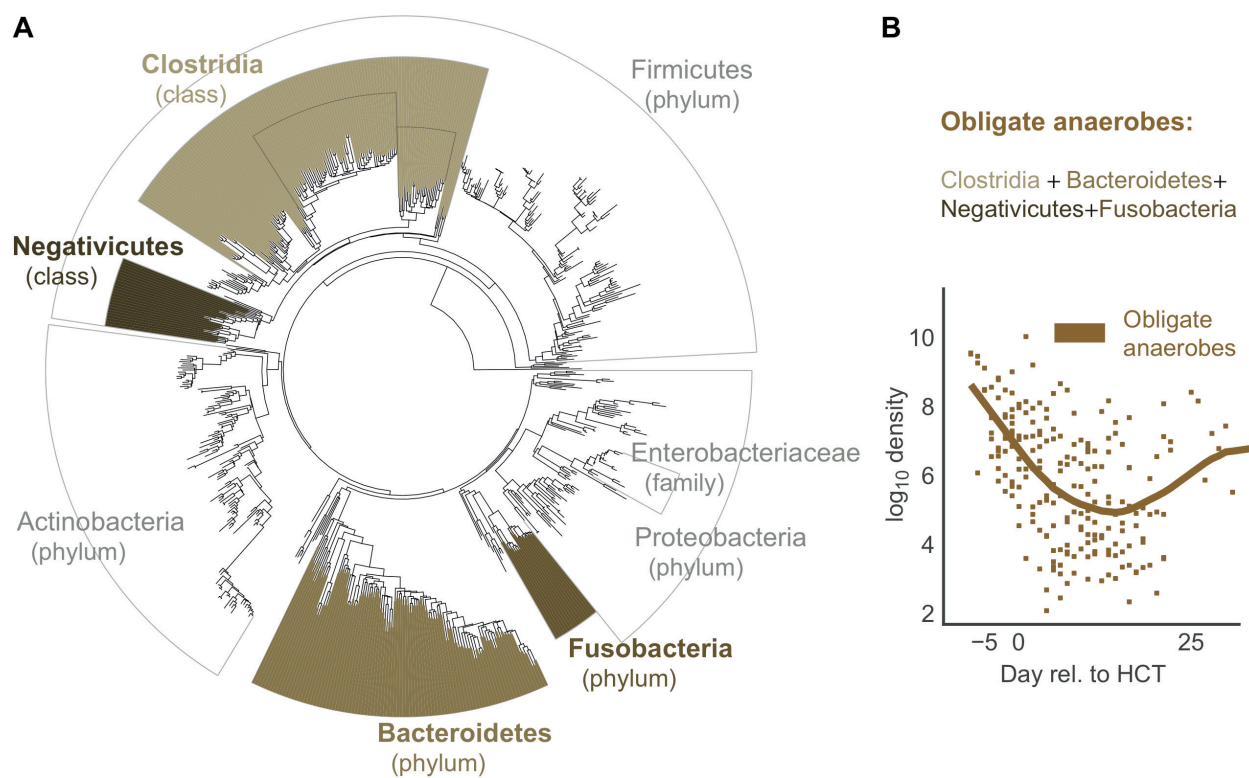

430

431



432 Figure 4:

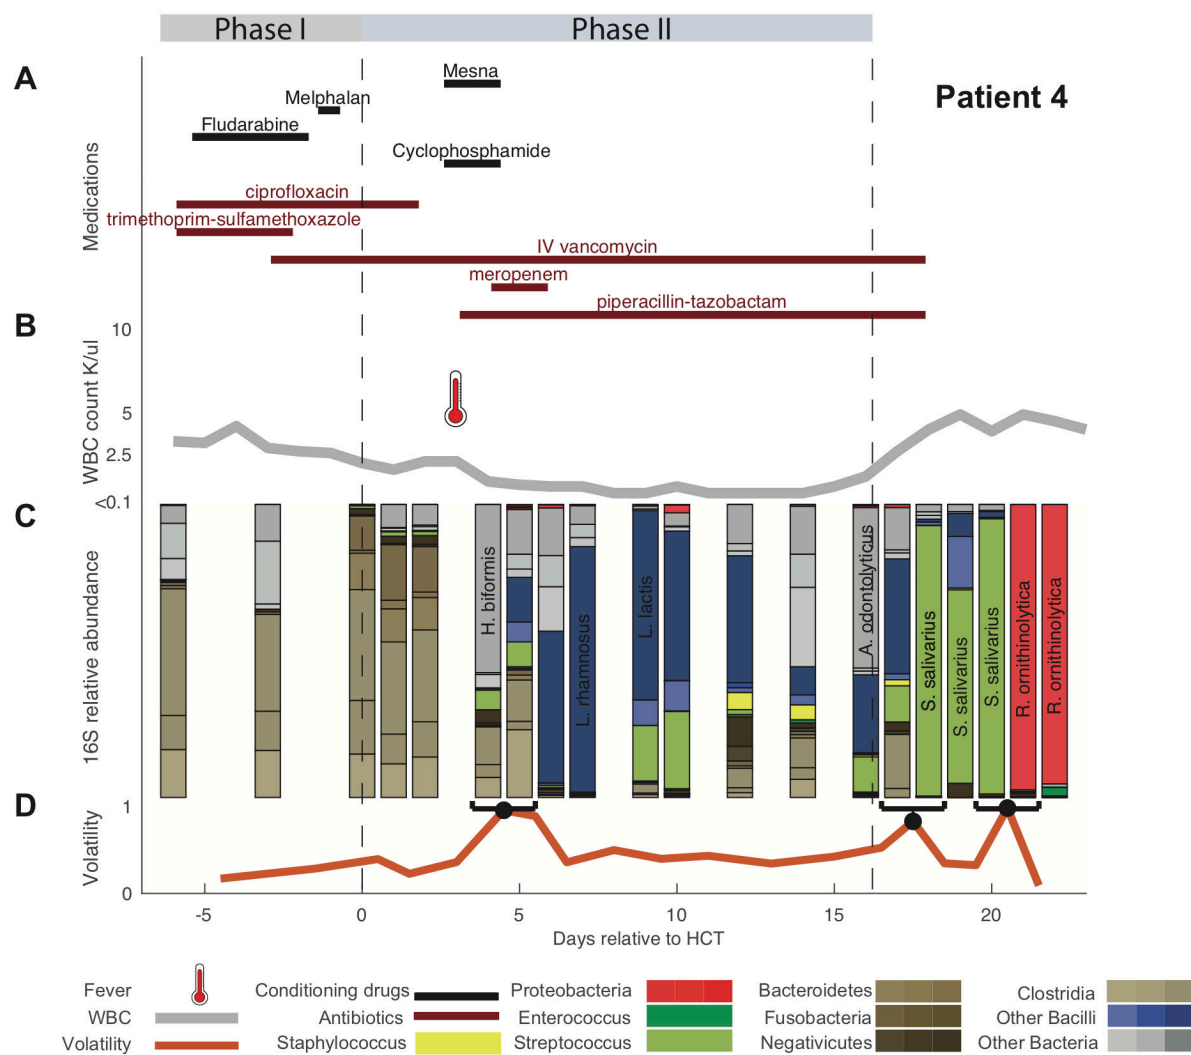

433

434

435

436

437

438

439 Figure 5:

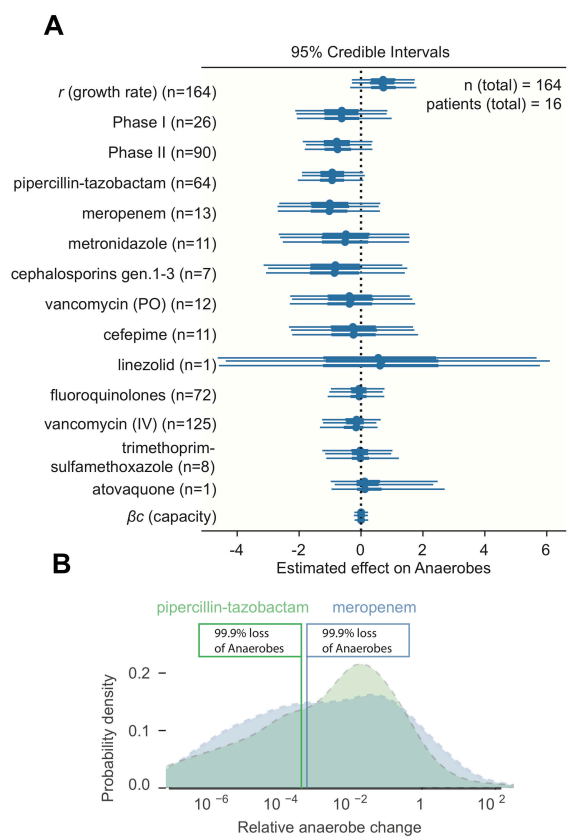

440

441

442

443

444

445

446

447

448 **Supplementary Figures and Captions:**

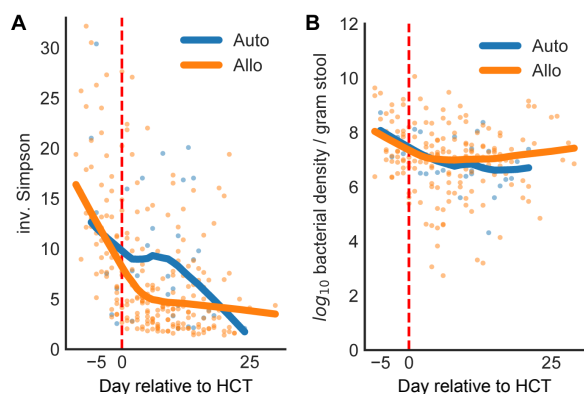

449

450 **Supplementary Figure 1: Microbiota destruction during HCT.** During conditioning, before stem cell transfusion (day  
451 0), the community diversity (A) of the microbiota in both allo- and auto-HCT patients tended to decline rapidly.  
452 Similarly, the bacterial density, measured as the total number of bacterial cells per gram of stool (B), also declined,  
453 with slight recovery of cell counts in allo-HCT patients during later days of hospitalization.

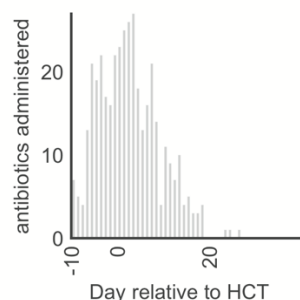

454

455 **Supplementary Figure 2:** Total counts of antibiotics prescribed per day relative to HCT, summed over all 18 patients.

456 **Supplementary Figure 3:** Timelines of all patients (see Figure 4). Available as combined supplementary file  
457 “supplementary\_figure3.pdf”.

458

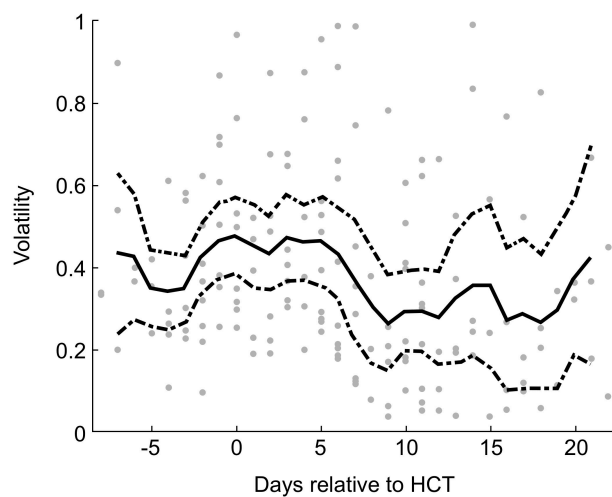

459

460 **Supplementary Figure 4:** Microbiota volatility per day relative to HCT between daily samples. The line shows a three

461 day rolling average, dashed lines indicate the 95% confidence intervals of the mean.

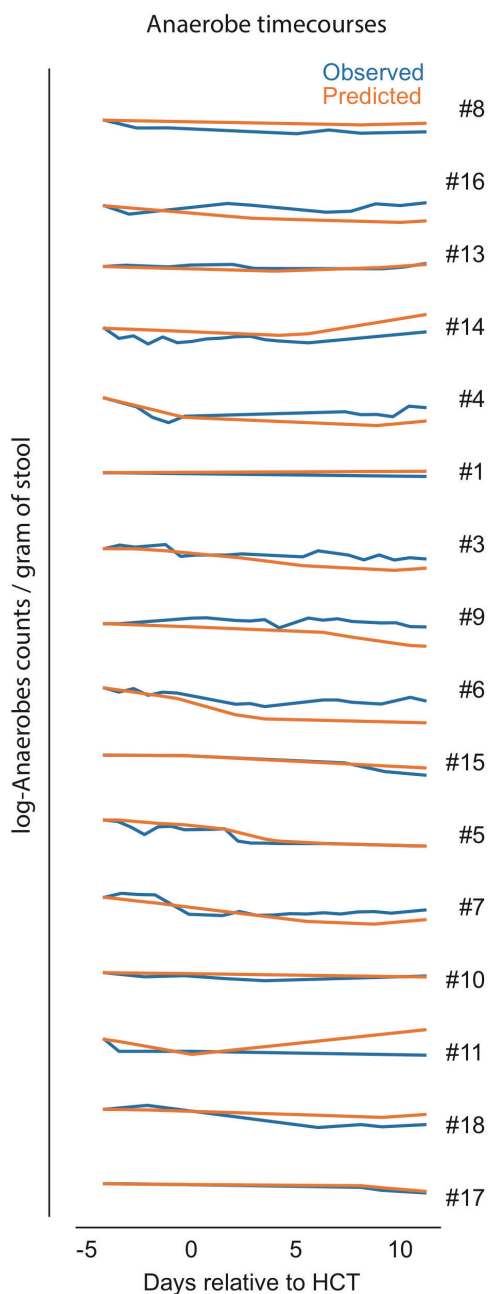

462

463 **Supplementary Figure 5:** Model predictions. A) Histogram of observed (blue) fold changes in anaerobe counts  
464 followed a similar distribution to the posterior predictions (orange). B) Starting from each patient's first observed  
465 anaerobe counts, we simulated forwards in time and plot the average predicted anaerobe time course (orange)  
466 against the observed (blue).

467

468 **Supplemental Methods:**

469 **Sample preparation and sequencing protocols**

470 DNA extraction: Briefly, a frozen aliquot ( $\approx 100$  mg) of each sample was suspended, while frozen, in a solution  
471 containing 500  $\mu$ l of extraction buffer (200 mM Tris, pH 8.0/200 mM NaCl/20 mM EDTA), 200  $\mu$ l of 20% SDS, 500  $\mu$ l  
472 of phenol:chloroform:isoamyl alcohol (25:24:1), and 500  $\mu$ l of 0.1-mm-diameter zirconia/silica beads (BioSpec  
473 Products). Microbial cells were lysed by mechanical disruption with a bead beater (BioSpec Products) for 2 min, after  
474 which two rounds of phenol:chloroform:isoamyl alcohol extraction were performed. DNA was precipitated with  
475 ethanol at -80 degrees and resuspended in 200  $\mu$ l of TE buffer with 100 mg/ml RNase. The isolated DNA was  
476 subjected to additional purification with QIAamp mini spin columns (Qiagen).

477 16S rDNA amplification and Illumina Sequencing: For each sample, duplicate 50- $\mu$ l PCR reactions were performed,  
478 each containing 50 ng of purified DNA and a master mix of 0.2 mM dNTPs, 1.5 mM MgCl<sub>2</sub>, 2.5 U Platinum Taq DNA  
479 polymerase, 2.5  $\mu$ l of 10X PCR buffer, and 0.5  $\mu$ M of each primer designed to amplify the V4-V5: 563F (5'-nnnnnnnn-  
480 NNNNNNNNNNNN-AYTGGGYDTAAAGNG-3') and 926R (5'- nnnnnnnn-NNNNNNNNNNNN-CCGTCAATTYHTTTRAGT-  
481 3'). A unique 12-base Golay barcode (Ns) precede the primers for sample identification [12] and 1-8 additional  
482 nucleotides were placed in front of the barcode to offset the sequencing of the primers. Cycling conditions were  
483 94°C for 3 minutes, followed by 27 cycles of 94°C for 50 seconds, 51°C for 30 seconds, and 72°C for 1 minute. 72°C  
484 for 5 min is used for the final elongation step. Replicate PCR products were pooled and amplicons were purified  
485 using the Qiaquick PCR Purification Kit (Qiagen). PCR products were quantified and pooled at equimolar amounts  
486 before proceeding with library preparation following the Illumina TruSeq Sample Preparation protocol. The  
487 completed library was sequenced on an Illumina Miseq platform following the Illumina recommended procedures  
488 with a paired end 250 x 250 bp kit.

489 Sequence processing: Paired end reads were assembled, processed, and grouped into operational taxonomic units  
490 (OTUs) of 97% similarity using the UPARSE pipeline [13]. Sequences were error-filtered, using maximum expected  
491 error ( $E_{max}=1$ ). Taxonomic assignment to species level was performed for representative sequences from each  
492 OUT; this was achieved by using a custom python script incorporating nucleotide BLAST (Basic Local Alignment

493 Search Tool), with the National Center for Biotechnology Information RefSeq as the reference training set [14]. We  
494 obtained a total of 4,055,808 high-quality 16S rRNA gene-encoding sequences, with a mean of 12,887 sequences per  
495 sample. A phylogenetic tree was constructed by aligning representative sequences to SILVA 16S reference.

496 Sequence designations and identity scores were manually inspected for quality and consistency in terms of  
497 taxonomic structure and secondary matches. Based on our testing and comparisons using mock community data,  
498 we have found this approach to yield good robust species-level approximations for our candidate sequences. In  
499 particular, species-level classification of clostridial species such as *Clostridium difficile* improved greatly compared  
500 with other routine classification methods.

501  
502 Total 16S quantification: Copy number of 16S rRNA genes for each sample was determined by quantitative PCR  
503 (qPCR) on total DNA extracted from fecal samples. Primers specific to the V4 - V5 region of the 16S gene 563F (5'-  
504 AYTGGGYDTAAAGNG-3') and 926Rb (5'- CCGTCAATTYHTTTRAGT-3') at 0.2  $\mu$ M concentrations were used with the  
505 DyNAmo HS SYBR green qPCR kit (Thermo Fisher Scientific). In order to determine absolute abundances and copy  
506 numbers of the 16S gene of unknown samples, a standard was created by taking the V4 and V5 regions from  
507 *Escherichia coli* cloned into the *Invitrogen* TOPO pcr2.1 TA vector<sup>AMP</sup>. The plasmid and insert are 4318bp in length.  
508 Copies /  $\mu$ L of our standard is calculated and a total of 7 1:5 serial dilutions starting with 100,000,000 copies create  
509 the standard curves which we map our unknown samples against.

510 The cycling conditions were as follows: 95°C for 10 min, followed by 40 cycles of 95°C for 30 s, 52°C for 30 s, and  
511 72°C for 30 s. 16s qPCR was performed on all stool samples in order to determine bacterial density in feces. We  
512 were unable to amplify bacterial 16S genes from 38 samples, suggesting that bacterial density in these samples  
513 was below the level of detection.

514

515
